# Supplementary material
Source: publisher figshare collection journal article supplement (https://acs.figshare.com/ndownloader/files/11144567)
Supplement: Supplementary file 1 [file 11144567]

Compound_ID	SMILES	cLogP	Liver Homogenate	Liver microsomes	Plasma
MBZ-C	O=C(C1=CC=C(NC(NC(OC)=O)=N2)C2=C1)C3=CC=CC=C3	3.08	100±2	100 ± 5	100 ± 5
1	O=C(C1=CC=C(N(COC(C(C)(C)C)=O)C(NC(OC)=O)=N2)C2=C1)C3=CC=CC=C3	4.23	37±2	0 ± 0	4 ± 0
2	O=C(C1=CC=C(N(COC(OC(C)C)=O)C(NC(OC)=O)=N2)C2=C1)C3=CC=CC=C3	3.58	0±0	0 ± 0	0 ± 0
7	O=C(C1=CC=C(N(COC(CNC([C@H](CC(C)C)NC(C)=O)=O)=O)C(NC(OC)=O)=N2)C2=C1)C3=CC=CC=C3	3.03	18±1	29 ± 1	0 ± 0
8	O=C(C1=CC=C(N(COC(CCC(O)=O)=O)C(NC(OC)=O)=N2)C2=C1)C3=CC=CC=C3	2.57	30±2	24 ± 0	78 ± 1
9	O=C(C1=CC=C(N(COC(OCC2OC(O)[C@H](O)[C@@H](O)[C@@H]2O)=O)C(NC(OC)=O)=N3)C3=C1)C4=CC=CC=C4	0.62	4±0	27 ± 0	18± 0
11	O=C(C1=CC=C(N(COP(O)(O)=O)C(NC(OC)=O)=N2)C2=C1)C3=CC=CC=C3	0.8	35±4	100 ± 2	62 ± 1
12	O=C(C1=CC=C(N(COP([O-])(OCOC(OC(C)C)=O)=O)C(NC(OC)=O)=N2)C2=C1)C3=CC=CC=C3.[Na+]	3.63	1±0	14 ± 0	73 ± 3
14	O=C(C1=CC=C(N(COC(CC[C@H](N)C(O)=O)=O)C(NC(OC)=O)=N2)C2=C1)C3=CC=CC=C3	0.4	n/a#	n/a#	n/a#
